# Supplementary material
Source: publisher figshare collection journal article supplement (https://tandf.figshare.com/articles/dataset/_/6834878)
Supplement: Supplementary file 1 [file 2]

The code is available at

<https://github.com/blayes/DEM>

Best,
