# Supplementary material
Source: publisher figshare collection journal article supplement (https://tandf.figshare.com/articles/dataset/_/6834878)
Supplement: Supplementary file 2 [file 2]

# An Asynchronous Distributed Expectation Maximization Algorithm For Massive Data: The DEM Algorithm

Sanvesh Srivastava <sup>\*</sup>, Glen DePalma <sup>†</sup>& Chuanhai Liu <sup>‡</sup>

June 14, 2018

## 1 Proof of Theorems in Sections 4.2 and 4.3

Our theoretical setup has the following assumptions:

1.  $\Theta$  is a subset in the  $P$ -dimensional Euclidean space  $\mathbb{R}^P$ .
2. The set  $\Pi_{\theta_0} \otimes \Theta_{\theta_0} = \{(\tilde{p}, \theta) \in \Pi \otimes \Theta : F(\tilde{p}, \theta) \geq F(\tilde{p}_0, \theta_0)\}$  is compact for any starting point of the  $(\tilde{p}_t, \theta_t)$  sequence, denoted as  $(\tilde{p}_0, \theta_0)$ , that satisfies  $\mathcal{L}(\theta_0) > -\infty$  and  $\tilde{p}_0 = \prod_{k=1}^K h(Y_k \mid Z_k, \theta_0)$ .
3.  $F(\tilde{p}, \theta)$  is continuous in  $\Pi \otimes \Theta$  and differentiable in the interior of  $\Pi \otimes \Theta$ .
4.  $\Pi_{\theta_0} \otimes \Theta_{\theta_0}$  is in the interior of  $\Pi \otimes \Theta$  for any  $\theta_0 \in \Theta$ .

---

<sup>\*</sup>Department of Statistics and Actuarial Science, The University of Iowa, Iowa City, Iowa 52242, [sanvesh-srivastava@uiowa.edu](mailto:sanvesh-srivastava@uiowa.edu)

<sup>†</sup>Department of Statistics, Purdue University, West Lafayette, Indiana 47907, [glen.depalma@gmail.com](mailto:glen.depalma@gmail.com)

<sup>‡</sup>Department of Statistics, Purdue University, West Lafayette, Indiana 47907, [chuanhai@purdue.edu](mailto:chuanhai@purdue.edu)

5. The first order differential  $\partial Q(\theta \mid \theta_t, \theta_{t_{(N+1)}}, \dots, \theta_{t_K}) / \partial \theta$  is continuous in  $(\theta, \theta_t, \theta_{t_{(N+1)}}, \dots, \theta_{t_K})$ .
6. Worker  $k$  returns  $Q_k$  to the manager infinitely often for  $t = 0, \dots, \infty$  and  $k = 1, \dots, K$ .

## 1.1 Proof of Theorem 4.1

The proof uses arguments similar to Theorems 1 and 2 of Neal & Hinton (1998). First, the E step of DEM at the  $(t + 1)$ -th iteration updates  $\tilde{p}_{t,k} = h(Y_k \mid Z_k, \theta_{t_k})$  to  $\tilde{p}_{(t+1),k} = h(Y_k \mid Z_k, \theta_t)$  for worker  $k$  if  $k \in U_{(t+1)}$ ; otherwise,  $\tilde{p}_{(t+1),k} = \tilde{p}_{t,k}$ . Define  $\tilde{p}_{(t+1)} = \prod_{k_1 \in U_{t+1}} \tilde{p}_{(t+1),k_1} \prod_{k_2 \in U_{t+1}^c} \tilde{p}_{(t+1),k_2}$ . Theorem 1 in Neal & Hinton (1998) implies that  $F(\tilde{p}_t, \theta_t) \leq F(\tilde{p}_{(t+1)}, \theta_t)$  for a given  $\theta_t$ . Second, the M step of DEM at the  $(t + 1)$ -th iteration updates  $\theta_t$  to  $\theta_{(t+1)}$  and increases  $F$  from  $F(\tilde{p}_{(t+1)}, \theta_t)$  to  $F(\tilde{p}_{(t+1)}, \theta_{(t+1)})$  for fixed  $\tilde{p}_{(t+1)}$ . At the end of  $(t + 1)$ -th iteration of DEM,  $F(\tilde{p}_t, \theta_t) \leq F(\tilde{p}_{(t+1)}, \theta_t) \leq F(\tilde{p}_{(t+1)}, \theta_{(t+1)})$ , where the first and last equality follow from Theorem 1 in Neal & Hinton (1998). Because  $t$  is a generic iteration, DEM maintains the monotone ascent of  $F(\tilde{p}, \theta)$  at every iteration and  $\{F(\tilde{p}_t, \theta_t), t \geq 0\}$  sequence converges because  $F(\tilde{p}, \theta)$  is upper bounded by our assumption. Theorem 2 in Neal & Hinton (1998) implies that if  $(\hat{\tilde{p}}, \hat{\theta})$  is a fixed point of  $F(\tilde{p}_t, \theta_t)$  sequence, then  $\hat{\mathcal{L}} = \mathcal{L}(\hat{\theta})$  is a fixed point of  $\mathcal{L}(\theta_t)$  sequence. This implies that there exists a monotone subsequence of  $\mathcal{L}(\theta_t)$  converging to  $\hat{\mathcal{L}}$ .

## 1.2 Proof of Theorem 4.2

To prove this theorem, we require the definition of a closed map. A point-to-set mapping  $A$  is closed on a set  $X$  if  $x_k \rightarrow x$ ,  $x_k \in X$ , and  $y_k \rightarrow y$ ,  $y_k \in A(x_k)$ , then  $y \in A(x)$  for every  $x \in X$ ; see Luenberger & Ye (2008, pp 203) for details. If  $A$  is continuous, then it is closed.

The proof is based on Theorems 1, 2, 4, and 5 in Wu (1983). Our assumptions imply that the point-to-set map  $(\tilde{p}_t, \theta_t) \mapsto (\tilde{p}_{t+1}, \theta_{t+1})$  is continuous, thus closed, on  $\Pi \otimes \Theta \cap (\mathcal{S} \cup \mathcal{M})^c$ ; see Theorem 2 in Wu (1983). Theorem 2 in Neal & Hinton (1998) implies that  $F(\tilde{p}_t, \theta_t) \leq$

$F(\tilde{p}_{t+1}, \theta_{t+1})$  for every  $(\tilde{p}_t, \theta_t) \in \Pi \otimes \Theta \cap (\mathcal{S} \cup \mathcal{M})^c$ , so  $F$  is our ascent function. The global convergence theorem in Wu (1983) implies that all limit points of  $(\tilde{p}_t, \theta_t)$  sequence lie in  $\mathcal{S} \cup \mathcal{M}$  and  $F(\tilde{p}_t, \theta_t)$  converges monotonically to  $\hat{F} = F(\hat{\tilde{p}}, \hat{\theta})$  for some  $(\hat{\tilde{p}}, \hat{\theta}) \in \mathcal{S} \cup \mathcal{M}$ .

If  $\mathcal{S}(\hat{F})$  (respectively  $\mathcal{M}(\hat{F}) = \{(\hat{\tilde{p}}, \hat{\theta})\}$ ), then there cannot be two different stationary points (respectively local maxima) with the same  $\hat{F}$ . This implies that  $(\tilde{p}_t, \theta_t) \rightarrow (\hat{\tilde{p}}, \hat{\theta})$  and  $\theta_t \rightarrow \hat{\theta}$  using coordinate-wise convergence. The first part of the theorem is proved.

Assumption 2 implies that  $(\tilde{p}_t, \theta_t)$  is a bounded sequence, so Theorem 5 in Wu (1983) implies that the set of limit points of the sequence  $(\tilde{p}_t, \theta_t)$  with  $\|(\tilde{p}_{t+1}, \theta_{t+1}) - (\tilde{p}_t, \theta_t)\|_{\Pi \otimes \Theta} \rightarrow 0$  as  $t \rightarrow \infty$  is connected and compact. Since  $\mathcal{S}(\hat{F})$  and  $\mathcal{M}(\hat{F})$  are discrete, the only connected and compact components of the stationary points (respectively local maxima) are singletons. All the limit points of  $(\tilde{p}_t, \theta_t)$  are in  $\mathcal{S}(\hat{F}) \cup \mathcal{M}(\hat{F})$ , so  $(\tilde{p}_t, \theta_t) \rightarrow (\hat{\tilde{p}}, \hat{\theta})$  and the second part of the theorem is also proved.

### 1.3 Proof of Theorem 4.3

Recall that

$$i_{\text{com}, \bar{\psi}} = \sum_{k=N+1}^K (i_{\text{com}, \psi})_{kk}, \quad i_{\text{obs}, \bar{\psi}} = \sum_{k=N+1}^K (i_{\text{obs}, \psi})_{kk}, \quad i_{\text{com}} = i_{\text{com}, \theta} + i_{\text{com}, \bar{\psi}}, \quad i_{\text{obs}} = i_{\text{obs}, \theta} + i_{\text{obs}, \bar{\psi}}.$$

Define  $C_{\theta, \bar{\psi}} = i_{\text{com}, \theta}^{-1} i_{\text{com}, \bar{\psi}}$  and  $O_{\bar{\psi}} = i_{\text{com}}^{-1} i_{\text{obs}, \bar{\psi}}$  and substitute them in

$$S_{\text{EM}} = i_{\text{com}}^{-1} i_{\text{obs}}, \quad i_{\text{obs}} = -\frac{\partial^2 \log g(Z_{1:K} | \theta)}{\partial \theta \cdot \partial \theta^T} \Big|_{\theta = \hat{\theta}^E}, \quad i_{\text{com}} = -\mathbb{E}_Y \left\{ \frac{\partial^2 \log f(Y_{1:K}, Z_{1:K} | \theta)}{\partial \theta \cdot \partial \theta^T} \mid Z_{1:K}, \theta \right\} \Big|_{\theta = \hat{\theta}^E},$$

where  $i_{\text{obs}}$  and  $i_{\text{com}}$  are the observed-data and complete-data information matrices, to obtain that

$$S_{\text{EM}} = i_{\text{com}}^{-1} i_{\text{obs}} = (I + i_{\text{com}, \theta}^{-1} i_{\text{com}, \bar{\psi}})^{-1} i_{\text{com}, \theta}^{-1} i_{\text{obs}, \theta} + O_{\bar{\psi}} = (I + C_{\theta, \bar{\psi}})^{-1} S_{\text{DEM}} + O_{\bar{\psi}}.$$

Simplifying the equality in the above display yields

$$\begin{aligned}\lambda_{\min}(S_{\text{EM}}) &\stackrel{(i)}{\leq} \lambda_{\max}\{(I + C_{\theta, \bar{\psi}})^{-1} S_{\text{DEM}}\} + \lambda_{\min}(O_{\bar{\psi}}) \stackrel{(ii)}{\leq} \lambda_{\max}\{(I + C_{\theta, \bar{\psi}})^{-1}\} \lambda_{\min}\{S_{\text{DEM}}\} + \lambda_{\min}(O_{\bar{\psi}}) \\ &= \{1 + \lambda_{\min}(C_{\theta, \bar{\psi}})\}^{-1} \lambda_{\min}\{S_{\text{DEM}}\} + \lambda_{\min}(O_{\bar{\psi}})\end{aligned}\quad (1)$$

$$\begin{aligned}\lambda_{\min}(S_{\text{EM}}) &\stackrel{(iii)}{\geq} \lambda_{\min}\{(I + C_{\theta, \bar{\psi}})^{-1} S_{\text{DEM}}\} + \lambda_{\min}(O_{\bar{\psi}}) \stackrel{(iv)}{\geq} \lambda_{\min}\{(I + C_{\theta, \bar{\psi}})^{-1}\} \lambda_{\min}(S_{\text{DEM}}) + \lambda_{\min}(O_{\bar{\psi}}) \\ &= \{1 + \lambda_{\max}(C_{\theta, \bar{\psi}})\}^{-1} \lambda_{\min}(S_{\text{DEM}}) + \lambda_{\min}(O_{\bar{\psi}}),\end{aligned}\quad (2)$$

where inequalities (i), (ii), (iii), and (iv) follow from Problem III.6.5 in Bhatia (1997); therefore,

$$\frac{\lambda_{\min}(S_{\text{DEM}})}{1 + \lambda_{\max}(C_{\theta, \bar{\psi}})} + \lambda_{\min}(O_{\bar{\psi}}) \leq \lambda_{\min}(S_{\text{EM}}) \leq \frac{\lambda_{\min}(S_{\text{DEM}})}{1 + \lambda_{\min}(C_{\theta, \bar{\psi}})} + \lambda_{\min}(O_{\bar{\psi}}).$$

## 2 Additional experimental results from Section 5

Recall the linear mixed effects model used for experiments. Let  $p$ ,  $q$ ,  $m$ ,  $n$ , and  $n_i$  be the number of fixed effects, number of random effects, sample size, total number of observations, and total number of observations for sample  $i$  ( $i = 1, \dots, m$ ) so that  $n = \sum_{i=1}^m n_i$ . If  $\mathbf{y}_i \in \mathbb{R}^{n_i}$  is the observation for sample  $i$  for  $i = 1, \dots, m$ , then

$$\mathbf{y}_i = X_i \boldsymbol{\beta} + Z_i \mathbf{b}_i + \mathbf{e}_i, \quad \mathbf{b}_i \sim N_q(\mathbf{0}, \Sigma), \Sigma = \tau^2 D, \quad \mathbf{e}_i \sim N_{n_i}(\mathbf{0}, \tau^2 I_{n_i}), \quad (3)$$

where  $X_i \in \mathbb{R}^{n_i \times p}$  and  $Z_i \in \mathbb{R}^{n_i \times q}$  are known matrices of fixed and random effects covariates, respectively,  $\boldsymbol{\beta} \in \mathbb{R}^p$  is the fixed effects parameter vector,  $\tau^2$  is the error variance parameter,  $D$  is a symmetric positive definite matrix,  $\mathbf{b}_i \in \mathbb{R}^q$  is the random effects vector for sample  $i$  that follows a  $q$ -dimensional Gaussian distribution with mean  $\mathbf{0}$  and covariance parameter  $\Sigma = \tau^2 D$ , and  $I_{n_i}$  is  $n_i$ -by- $n_i$  identity matrix. The parameter vector is  $\theta = \{\boldsymbol{\beta}, \Sigma, \tau^2\}$ .

The linear mixed-effects model in (3) satisfies Assumptions 1–5 in Theorem 4.2. Let  $LL^T$  be the Cholesky decomposition of  $\Sigma$ , where  $L$  is lower triangular, and  $\text{vech}(L)$  be the lower

triangular part of  $L$  arranged in a  $q(q+1)/2$ -dimensional vector. Our parameter vector can be also defined as  $\theta = \{\beta, \text{vech}(L), \tau^2\}$  and we assume that the parameter space  $\Theta$  is a compact subset of the  $(p + q(q+1)/2 + 1)$ -dimensional Euclidean space. This verifies Assumption 1. In our simulation and real data analysis, we fix  $\beta_0 = \mathbf{0}$ ,  $L_0 = I_q$ , and  $\tau_0^2 = 10$  as the starting point of DEM iterations. The conditional distribution of missing data  $\mathbf{b}_i$  in (3) is also Gaussian with mean  $\hat{\mathbf{b}}_i$  and covariance matrix  $\hat{C}_i$  ( $i = 1, \dots, m$ ); see Equation 3.6 in van Dyk (2000) for the analytic forms of  $\hat{\mathbf{b}}_i$  and  $\hat{C}_i$ . Define  $\Pi$  in Assumption 2 to be a compact set of continuous distributions with density  $\tilde{p}$ , finite  $\text{KL}\{\tilde{p}, N(\hat{\mathbf{b}}_i, \hat{C}_i)\}$  for every  $i$ , and finite  $\int \log\{\tilde{p}(y)\}\tilde{p}(y)dy$ . For any such  $\theta_0$ ,  $\Pi_{\theta_0} \otimes \Theta_{\theta_0}$  is a compact subset of  $\Pi \otimes \Theta$ , which verifies Assumption 4. Assumption 2 is true because the likelihood function is finite at  $\theta_0 = \{\beta_0, \text{vech}(L_0), \tau_0^2\}$ . The likelihood for  $\theta$  in (3) is based on a Gaussian density and is differentiable in the interior of  $\Theta$ , which verifies Assumption 3. Equation 3.4 in van Dyk (2000) shows that  $Q_k(\theta \mid \theta_{t_k})$  is differentiable for every  $k$ . The  $Q$ -function in DEM is the sum of  $Q_1(\theta \mid \theta_{t_1}), \dots, Q_K(\theta \mid \theta_{t_K})$ , so it is also differentiable, which verifies Assumption 5. Our implementation ensures that  $Q_k(\theta \mid \theta_{t_k})$  is returned to the manager for every  $k$  before convergence is declared, satisfying Assumption 6.

The accuracy of every algorithm in parameter estimation was judged using errors defined as

$$\begin{aligned} \text{err}_{\beta}^2 &= p^{-1} \sum_{i=1}^p \left( \hat{\beta}_i - \hat{\beta}_i^{\text{EM}} \right)^2, \quad \text{err}_{\tau^2}^2 = (\hat{\tau}^2 - \hat{\tau}^{2\text{EM}})^2, \quad \text{err}_{\text{var}}^2 = q^{-1} \sum_{i=1}^q \left( \hat{\Sigma}_{ii} - \hat{\Sigma}_{ii}^{\text{EM}} \right)^2, \\ \text{err}_{\text{cov}}^2 &= 2q^{-1}(q-1)^{-1} \sum_{i=1}^{q-1} \sum_{j=i+1}^q \left( \hat{\Sigma}_{ij} - \hat{\Sigma}_{ij}^{\text{EM}} \right)^2, \end{aligned} \quad (4)$$

where  $\{\hat{\beta}^{\text{EM}}, \hat{\Sigma}^{\text{EM}}, \hat{\tau}^{2\text{EM}}\}$  and  $\{\hat{\beta}, \hat{\Sigma}, \hat{\tau}^2\}$  respectively were the parameter estimates of ECME<sub>0</sub> and its competitor, including lme4, Meta-lme4, IEM, or DEM. If  $\text{err}_i$  represented the error in replication  $i$  of the experiment, the root mean square error (RMSE) over  $R$  replications

was defined as

$$\begin{aligned} \text{RMSE}_{\beta}^2 &= R^{-1} \sum_{i=1}^R \text{err}_{\beta i}^2, & \text{RMSE}_{\tau^2}^2 &= R^{-1} \sum_{i=1}^R \text{err}_{\tau^2 i}^2, \\ \text{RMSE}_{\text{var}}^2 &= R^{-1} \sum_{i=1}^R \text{err}_{\text{var} i}^2, & \text{RMSE}_{\text{cov}}^2 &= R^{-1} \sum_{i=1}^R \text{err}_{\text{cov} i}^2. \end{aligned} \quad (5)$$

The smaller the RMSE, the closer are the results to the benchmark ECME<sub>0</sub> algorithm.

Table 1: Root mean square error (5) in estimation of fixed effects ( $\beta$ ) averaged across simulation replications. The maximum Monte Carlo error is of the order  $10^{-4}$

|                        | $K = 10$             |          |          |          |                      |          |          |          |
|------------------------|----------------------|----------|----------|----------|----------------------|----------|----------|----------|
|                        | $m = 10^4, n = 10^6$ |          |          |          | $m = 10^5, n = 10^7$ |          |          |          |
|                        | $q = 3$              |          | $q = 6$  |          | $q = 3$              |          | $q = 6$  |          |
|                        | $p = 10$             | $p = 20$ | $p = 10$ | $p = 20$ | $p = 10$             | $p = 20$ | $p = 10$ | $p = 20$ |
| lme4                   | 0.0000               | 0.0000   | 0.0000   | 0.0000   | 0.0000               | 0.0000   | 0.0000   | 0.0000   |
| Meta-lme4              | 0.0000               | 0.0000   | 0.0000   | 0.0000   | 0.0000               | 0.0000   | 0.0000   | 0.0000   |
| IEM                    | 0.0000               | 0.0000   | 0.0000   | 0.0000   | 0.0000               | 0.0000   | 0.0000   | 0.0000   |
| DEM ( $\gamma = 0.3$ ) | 0.0000               | 0.0000   | 0.0000   | 0.0000   | 0.0000               | 0.0000   | 0.0000   | 0.0000   |
| DEM ( $\gamma = 0.5$ ) | 0.0000               | 0.0000   | 0.0000   | 0.0000   | 0.0000               | 0.0000   | 0.0000   | 0.0000   |
| DEM ( $\gamma = 0.7$ ) | 0.0000               | 0.0000   | 0.0000   | 0.0000   | 0.0000               | 0.0000   | 0.0000   | 0.0000   |
|                        | $K = 20$             |          |          |          |                      |          |          |          |
|                        | $m = 10^4, n = 10^6$ |          |          |          | $m = 10^5, n = 10^7$ |          |          |          |
|                        | $q = 3$              |          | $q = 6$  |          | $q = 3$              |          | $q = 6$  |          |
|                        | $p = 10$             | $p = 20$ | $p = 10$ | $p = 20$ | $p = 10$             | $p = 20$ | $p = 10$ | $p = 20$ |
| lme4                   | 0.0000               | 0.0000   | 0.0000   | 0.0000   | 0.0000               | 0.0000   | 0.0000   | 0.0000   |
| Meta-lme4              | 0.0001               | 0.0000   | 0.0001   | 0.0000   | 0.0000               | 0.0000   | 0.0000   | 0.0000   |
| IEM                    | 0.0000               | 0.0000   | 0.0000   | 0.0000   | 0.0000               | 0.0000   | 0.0000   | 0.0000   |
| DEM ( $\gamma = 0.3$ ) | 0.0000               | 0.0000   | 0.0000   | 0.0000   | 0.0000               | 0.0000   | 0.0000   | 0.0000   |
| DEM ( $\gamma = 0.5$ ) | 0.0000               | 0.0000   | 0.0000   | 0.0000   | 0.0000               | 0.0000   | 0.0000   | 0.0000   |
| DEM ( $\gamma = 0.7$ ) | 0.0000               | 0.0000   | 0.0000   | 0.0000   | 0.0000               | 0.0000   | 0.0000   | 0.0000   |

## References

- Bhatia, R. (1997), *Matrix Analysis*, Vol. 169, Springer-Verlag, New York.
- Luenberger, D. G. & Ye, Y. (2008), *Linear and nonlinear programming*, Vol. 116, Springer.
- Neal, R. M. & Hinton, G. E. (1998), A view of the EM algorithm that justifies incremental, sparse, and other variants, *in* ‘Learning in graphical models’, Springer, pp. 355–368.
- van Dyk, D. A. (2000), ‘Fitting mixed-effects models using efficient EM-type algorithms’, *Journal of Computational and Graphical Statistics* **9**(1), 78–98.

Wu, C. (1983), ‘On the convergence properties of the EM algorithm’, *The Annals of Statistics* **11**(1), 95–103.

Table 2: Root mean square error (5) in the estimation of  $\tau^2$  and  $\Sigma$  averaged across simulation replications. The maximum Monte Carlo errors are of the order  $10^{-4}$ ,  $10^{-2}$ , and  $10^{-3}$  for the error variances, variances of the random effects, and covariances of random effects

| Error variance ( $\tau^2$ )                                        |          |          |          |          |                      |          |          |          |
|--------------------------------------------------------------------|----------|----------|----------|----------|----------------------|----------|----------|----------|
| $K = 10$                                                           |          |          |          |          |                      |          |          |          |
| $m = 10^4, n = 10^6$                                               |          |          |          |          | $m = 10^5, n = 10^7$ |          |          |          |
| $q = 3$                                                            |          | $q = 6$  |          |          | $q = 3$              |          | $q = 6$  |          |
|                                                                    | $p = 10$ | $p = 20$ | $p = 10$ | $p = 20$ | $p = 10$             | $p = 20$ | $p = 10$ | $p = 20$ |
| lme4                                                               | 0.0000   | 0.0000   | 0.0000   | 0.0000   | 0.0000               | 0.0000   | 0.0000   | 0.0000   |
| Meta-lme4                                                          | 0.0000   | 0.0000   | 0.0000   | 0.0000   | 0.0000               | 0.0000   | 0.0000   | 0.0000   |
| IEM                                                                | 0.0001   | 0.0071   | 0.0004   | 0.0002   | 0.0000               | 0.0000   | 0.0000   | 0.0000   |
| DEM ( $\gamma = 0.3$ )                                             | 0.0000   | 0.0000   | 0.0000   | 0.0000   | 0.0000               | 0.0000   | 0.0000   | 0.0000   |
| DEM ( $\gamma = 0.5$ )                                             | 0.0000   | 0.0000   | 0.0000   | 0.0000   | 0.0000               | 0.0000   | 0.0000   | 0.0000   |
| DEM ( $\gamma = 0.7$ )                                             | 0.0000   | 0.0000   | 0.0000   | 0.0000   | 0.0000               | 0.0000   | 0.0000   | 0.0000   |
| $K = 20$                                                           |          |          |          |          |                      |          |          |          |
| $m = 10^4, n = 10^6$                                               |          |          |          |          | $m = 10^5, n = 10^7$ |          |          |          |
| $q = 3$                                                            |          | $q = 6$  |          |          | $q = 3$              |          | $q = 6$  |          |
|                                                                    | $p = 10$ | $p = 20$ | $p = 10$ | $p = 20$ | $p = 10$             | $p = 20$ | $p = 10$ | $p = 20$ |
| lme4                                                               | 0.0000   | 0.0000   | 0.0000   | 0.0000   | 0.0000               | 0.0000   | 0.0000   | 0.0000   |
| Meta-lme4                                                          | 0.0001   | 0.0001   | 0.0001   | 0.0001   | 0.0000               | 0.0000   | 0.0000   | 0.0000   |
| IEM                                                                | 0.0001   | 0.0002   | 0.0008   | 0.0018   | 0.0001               | 0.0002   | 0.0001   | 0.0001   |
| DEM ( $\gamma = 0.3$ )                                             | 0.0000   | 0.0000   | 0.0000   | 0.0000   | 0.0000               | 0.0000   | 0.0000   | 0.0000   |
| DEM ( $\gamma = 0.5$ )                                             | 0.0000   | 0.0000   | 0.0000   | 0.0000   | 0.0000               | 0.0000   | 0.0000   | 0.0000   |
| DEM ( $\gamma = 0.7$ )                                             | 0.0000   | 0.0000   | 0.0000   | 0.0000   | 0.0000               | 0.0000   | 0.0000   | 0.0000   |
| Variances of random effects (diagonal elements of $\Sigma$ )       |          |          |          |          |                      |          |          |          |
| $K = 10$                                                           |          |          |          |          |                      |          |          |          |
| $m = 10^4, n = 10^6$                                               |          |          |          |          | $m = 10^5, n = 10^7$ |          |          |          |
| $q = 3$                                                            |          | $q = 6$  |          |          | $q = 3$              |          | $q = 6$  |          |
|                                                                    | $p = 10$ | $p = 20$ | $p = 10$ | $p = 20$ | $p = 10$             | $p = 20$ | $p = 10$ | $p = 20$ |
| lme4                                                               | 0.0000   | 0.0000   | 0.0000   | 0.0000   | 0.0000               | 0.0000   | 0.0000   | 0.0000   |
| Meta-lme4                                                          | 0.0008   | 0.0008   | 0.0018   | 0.0015   | 0.0001               | 0.0001   | 0.0001   | 0.0002   |
| IEM                                                                | 0.0001   | 0.0017   | 0.0001   | 0.0001   | 0.0000               | 0.0000   | 0.0000   | 0.0000   |
| DEM ( $\gamma = 0.3$ )                                             | 0.0000   | 0.0000   | 0.0000   | 0.0000   | 0.0000               | 0.0000   | 0.0000   | 0.0000   |
| DEM ( $\gamma = 0.5$ )                                             | 0.0000   | 0.0000   | 0.0000   | 0.0000   | 0.0000               | 0.0000   | 0.0000   | 0.0000   |
| DEM ( $\gamma = 0.7$ )                                             | 0.0000   | 0.0000   | 0.0000   | 0.0000   | 0.0000               | 0.0000   | 0.0000   | 0.0000   |
| $K = 20$                                                           |          |          |          |          |                      |          |          |          |
| $m = 10^4, n = 10^6$                                               |          |          |          |          | $m = 10^5, n = 10^7$ |          |          |          |
| $q = 3$                                                            |          | $q = 6$  |          |          | $q = 3$              |          | $q = 6$  |          |
|                                                                    | $p = 10$ | $p = 20$ | $p = 10$ | $p = 20$ | $p = 10$             | $p = 20$ | $p = 10$ | $p = 20$ |
| lme4                                                               | 0.0000   | 0.0000   | 0.0000   | 0.0000   | 0.0000               | 0.0000   | 0.0000   | 0.0000   |
| Meta-lme4                                                          | 0.0009   | 0.0009   | 0.0022   | 0.0024   | 0.0001               | 0.0001   | 0.0003   | 0.0003   |
| IEM                                                                | 0.0001   | 0.0001   | 0.0002   | 0.0171   | 0.0000               | 0.0001   | 0.0000   | 0.0000   |
| DEM ( $\gamma = 0.3$ )                                             | 0.0000   | 0.0000   | 0.0000   | 0.0000   | 0.0000               | 0.0000   | 0.0000   | 0.0000   |
| DEM ( $\gamma = 0.5$ )                                             | 0.0000   | 0.0000   | 0.0000   | 0.0000   | 0.0000               | 0.0000   | 0.0000   | 0.0000   |
| DEM ( $\gamma = 0.7$ )                                             | 0.0000   | 0.0000   | 0.0000   | 0.0000   | 0.0000               | 0.0000   | 0.0000   | 0.0000   |
| Covariances of random effects (off-diagonal elements of $\Sigma$ ) |          |          |          |          |                      |          |          |          |
| $K = 10$                                                           |          |          |          |          |                      |          |          |          |
| $m = 10^4, n = 10^6$                                               |          |          |          |          | $m = 10^5, n = 10^7$ |          |          |          |
| $q = 3$                                                            |          | $q = 6$  |          |          | $q = 3$              |          | $q = 6$  |          |
|                                                                    | $p = 10$ | $p = 20$ | $p = 10$ | $p = 20$ | $p = 10$             | $p = 20$ | $p = 10$ | $p = 20$ |
| lme4                                                               | 0.0000   | 0.0000   | 0.0000   | 0.0000   | 0.0000               | 0.0000   | 0.0000   | 0.0000   |
| Meta-lme4                                                          | 0.0006   | 0.0006   | 0.00010  | 0.0009   | 0.0001               | 0.0001   | 0.0001   | 0.0001   |
| IEM                                                                | 0.0000   | 0.0010   | 0.0000   | 0.0000   | 0.0000               | 0.0000   | 0.0000   | 0.0000   |
| DEM ( $\gamma = 0.3$ )                                             | 0.0000   | 0.0000   | 0.0000   | 0.0000   | 0.0000               | 0.0000   | 0.0000   | 0.0000   |
| DEM ( $\gamma = 0.5$ )                                             | 0.0000   | 0.0000   | 0.0000   | 0.0000   | 0.0000               | 0.0000   | 0.0000   | 0.0000   |
| DEM ( $\gamma = 0.7$ )                                             | 0.0000   | 0.0000   | 0.0000   | 0.0000   | 0.0000               | 0.0000   | 0.0000   | 0.0000   |
| $K = 20$                                                           |          |          |          |          |                      |          |          |          |
| $m = 10^4, n = 10^6$                                               |          |          |          |          | $m = 10^5, n = 10^7$ |          |          |          |
| $q = 3$                                                            |          | $q = 6$  |          |          | $q = 3$              |          | $q = 6$  |          |
|                                                                    | $p = 10$ | $p = 20$ | $p = 10$ | $p = 20$ | $p = 10$             | $p = 20$ | $p = 10$ | $p = 20$ |
| lme4                                                               | 0.0000   | 0.0000   | 0.0000   | 0.0000   | 0.0000               | 0.0000   | 0.0000   | 0.0000   |
| Meta-lme4                                                          | 0.0006   | 0.0007   | 0.0015   | 0.0014   | 0.0001               | 0.0001   | 0.0002   | 0.0002   |
| IEM                                                                | 0.0000   | 0.0000   | 0.0001   | 0.0040   | 0.0000               | 0.0000   | 0.0000   | 0.0000   |
| DEM ( $\gamma = 0.3$ )                                             | 0.0000   | 0.0000   | 0.0000   | 0.0000   | 0.0000               | 0.0000   | 0.0000   | 0.0000   |
| DEM ( $\gamma = 0.5$ )                                             | 0.0000   | 0.0000   | 0.0000   | 0.0000   | 0.0000               | 0.0000   | 0.0000   | 0.0000   |
| DEM ( $\gamma = 0.7$ )                                             | 0.0000   | 0.0000   | 0.0000   | 0.0000   | 0.0000               | 0.0000   | 0.0000   | 0.0000   |



Table 3: The ratio of IEM or DEM and ECME<sub>0</sub> log likelihoods averaged over simulation replications. Monte Carlo errors are in parenthesis

|                        | IEM or DEM log likelihood / ECME <sub>0</sub> log likelihood |             |             |             |                      |             |             |             |
|------------------------|--------------------------------------------------------------|-------------|-------------|-------------|----------------------|-------------|-------------|-------------|
|                        | $K = 10$                                                     |             |             |             |                      |             |             |             |
|                        | $m = 10^4, n = 10^6$                                         |             |             |             | $m = 10^5, n = 10^7$ |             |             |             |
|                        | $q = 3$                                                      |             | $q = 6$     |             | $q = 3$              |             | $q = 6$     |             |
|                        | $p = 10$                                                     | $p = 20$    | $p = 10$    | $p = 20$    | $p = 10$             | $p = 20$    | $p = 10$    | $p = 20$    |
| IEM                    | 1.00 (0.00)                                                  | 1.00 (0.00) | 1.00 (0.00) | 1.00 (0.00) | 1.00 (0.00)          | 1.00 (0.00) | 1.00 (0.00) | 1.00 (0.00) |
| DEM ( $\gamma = 0.3$ ) | 1.00 (0.00)                                                  | 1.00 (0.00) | 1.00 (0.00) | 1.00 (0.00) | 1.00 (0.00)          | 1.00 (0.00) | 1.00 (0.00) | 1.00 (0.00) |
| DEM ( $\gamma = 0.5$ ) | 1.00 (0.00)                                                  | 1.00 (0.00) | 1.00 (0.00) | 1.00 (0.00) | 1.00 (0.00)          | 1.00 (0.00) | 1.00 (0.00) | 1.00 (0.00) |
| DEM ( $\gamma = 0.7$ ) | 1.00 (0.00)                                                  | 1.00 (0.00) | 1.00 (0.00) | 1.00 (0.00) | 1.00 (0.00)          | 1.00 (0.00) | 1.00 (0.00) | 1.00 (0.00) |
|                        | $K = 20$                                                     |             |             |             |                      |             |             |             |
|                        | $m = 10^4, n = 10^6$                                         |             |             |             | $m = 10^5, n = 10^7$ |             |             |             |
|                        | $q = 3$                                                      |             | $q = 6$     |             | $q = 3$              |             | $q = 6$     |             |
|                        | $p = 10$                                                     | $p = 20$    | $p = 10$    | $p = 20$    | $p = 10$             | $p = 20$    | $p = 10$    | $p = 20$    |
| IEM                    | 1.00 (0.00)                                                  | 1.00 (0.00) | 1.00 (0.00) | 1.00 (0.00) | 1.00 (0.00)          | 1.00 (0.00) | 1.00 (0.00) | 1.00 (0.00) |
| DEM ( $\gamma = 0.3$ ) | 1.00 (0.00)                                                  | 1.00 (0.00) | 1.00 (0.00) | 1.00 (0.00) | 1.00 (0.00)          | 1.00 (0.00) | 1.00 (0.00) | 1.00 (0.00) |
| DEM ( $\gamma = 0.5$ ) | 1.00 (0.00)                                                  | 1.00 (0.00) | 1.00 (0.00) | 1.00 (0.00) | 1.00 (0.00)          | 1.00 (0.00) | 1.00 (0.00) | 1.00 (0.00) |
| DEM ( $\gamma = 0.7$ ) | 1.00 (0.00)                                                  | 1.00 (0.00) | 1.00 (0.00) | 1.00 (0.00) | 1.00 (0.00)          | 1.00 (0.00) | 1.00 (0.00) | 1.00 (0.00) |

Table 4: Root mean square error (5) in estimation of fixed effects ( $\beta$ ), variances of random effects (diagonal elements of  $\Sigma$ ), error variance ( $\tau^2$ ), and covariances of random effects (off-diagonal elements of  $\Sigma$ ) averaged over all replications. The maximum Monte Carlo errors are of the order  $10^{-3}$ ,  $10^{-4}$ ,  $10^{-3}$ , and  $10^{-4}$ , respectively. The subscripts 1, ..., 6 represent *Action*, *Children – Action*, *Comedy – Action*, *Drama – Action*, *popularity*, and *previous* predictors

|                        | $\beta_{\text{Action}}$    | $\beta_{\text{Children – Action}}$    | $\beta_{\text{Comedy – Action}}$    | $\beta_{\text{Drama – Action}}$    | $\beta_{\text{popularity}}$    | $\beta_{\text{previous}}$    |               |               |
|------------------------|----------------------------|---------------------------------------|-------------------------------------|------------------------------------|--------------------------------|------------------------------|---------------|---------------|
| lme4                   | 0.0000                     | 0.0000                                | 0.0000                              | 0.0000                             | 0.0000                         | 0.0000                       |               |               |
| Meta-lme4              | 0.0000                     | 0.0002                                | 0.0001                              | 0.0001                             | 0.0000                         | 0.0000                       |               |               |
| IEM                    | 0.0000                     | 0.0000                                | 0.0000                              | 0.0000                             | 0.0000                         | 0.0000                       |               |               |
| DEM ( $\gamma = 0.3$ ) | 0.0000                     | 0.0000                                | 0.0000                              | 0.0000                             | 0.0000                         | 0.0000                       |               |               |
| DEM ( $\gamma = 0.5$ ) | 0.0000                     | 0.0000                                | 0.0000                              | 0.0000                             | 0.0000                         | 0.0000                       |               |               |
| DEM ( $\gamma = 0.7$ ) | 0.0000                     | 0.0000                                | 0.0000                              | 0.0000                             | 0.0000                         | 0.0000                       |               |               |
|                        | $\sigma^2_{\text{Action}}$ | $\sigma^2_{\text{Children – Action}}$ | $\sigma^2_{\text{Comedy – Action}}$ | $\sigma^2_{\text{Drama – Action}}$ | $\sigma^2_{\text{popularity}}$ | $\sigma^2_{\text{previous}}$ | $\tau^2$      |               |
| lme4                   | 0.0000                     | 0.0000                                | 0.0000                              | 0.0000                             | 0.0000                         | 0.0000                       | 0.0006        |               |
| Meta-lme4              | 0.0001                     | 0.0002                                | 0.0001                              | 0.0000                             | 0.0000                         | 0.0001                       | 0.0007        |               |
| IEM                    | 0.0000                     | 0.0000                                | 0.0000                              | 0.0000                             | 0.0000                         | 0.0000                       | 0.0010        |               |
| DEM ( $\gamma = 0.3$ ) | 0.0000                     | 0.0000                                | 0.0000                              | 0.0000                             | 0.0000                         | 0.0000                       | 0.0008        |               |
| DEM ( $\gamma = 0.5$ ) | 0.0000                     | 0.0000                                | 0.0000                              | 0.0000                             | 0.0000                         | 0.0000                       | 0.0007        |               |
| DEM ( $\gamma = 0.7$ ) | 0.0000                     | 0.0000                                | 0.0000                              | 0.0000                             | 0.0000                         | 0.0000                       | 0.0006        |               |
|                        | $\sigma_{12}$              | $\sigma_{13}$                         | $\sigma_{14}$                       | $\sigma_{15}$                      | $\sigma_{16}$                  | $\sigma_{23}$                | $\sigma_{24}$ | $\sigma_{25}$ |
| lme4                   | 0.0000                     | 0.0000                                | 0.0000                              | 0.0000                             | 0.0000                         | 0.0000                       | 0.0000        | 0.0000        |
| Meta-lme4              | 0.0001                     | 0.0001                                | 0.0000                              | 0.0000                             | 0.0001                         | 0.0001                       | 0.0001        | 0.0000        |
| IEM                    | 0.0000                     | 0.0000                                | 0.0000                              | 0.0000                             | 0.0000                         | 0.0000                       | 0.0000        | 0.0000        |
| DEM ( $\gamma = 0.3$ ) | 0.0000                     | 0.0000                                | 0.0000                              | 0.0000                             | 0.0000                         | 0.0000                       | 0.0000        | 0.0000        |
| DEM ( $\gamma = 0.5$ ) | 0.0000                     | 0.0000                                | 0.0000                              | 0.0000                             | 0.0000                         | 0.0000                       | 0.0000        | 0.0000        |
| DEM ( $\gamma = 0.7$ ) | 0.0000                     | 0.0000                                | 0.0000                              | 0.0000                             | 0.0000                         | 0.0000                       | 0.0000        | 0.0000        |
|                        | $\sigma_{26}$              | $\sigma_{34}$                         | $\sigma_{35}$                       | $\sigma_{36}$                      | $\sigma_{45}$                  | $\sigma_{46}$                | $\sigma_{56}$ |               |
| lme4                   | 0.0000                     | 0.0000                                | 0.0000                              | 0.0000                             | 0.0000                         | 0.0000                       | 0.0000        |               |
| Meta-lme4              | 0.0001                     | 0.0000                                | 0.0000                              | 0.0000                             | 0.0001                         | 0.0001                       | 0.0000        |               |
| IEM                    | 0.0000                     | 0.0000                                | 0.0000                              | 0.0000                             | 0.0000                         | 0.0000                       | 0.0000        |               |
| DEM ( $\gamma = 0.3$ ) | 0.0000                     | 0.0000                                | 0.0000                              | 0.0000                             | 0.0000                         | 0.0000                       | 0.0000        |               |
| DEM ( $\gamma = 0.5$ ) | 0.0000                     | 0.0000                                | 0.0000                              | 0.0000                             | 0.0000                         | 0.0000                       | 0.0000        |               |
| DEM ( $\gamma = 0.7$ ) | 0.0000                     | 0.0000                                | 0.0000                              | 0.0000                             | 0.0000                         | 0.0000                       | 0.0000        |               |

Table 5: The ratio of IEM or DEM log likelihood over ECME<sub>0</sub> log likelihood averaged over all replications. Monte Carlo errors are in parenthesis

| IEM             | DEM ( $\gamma = 0.30$ ) | DEM ( $\gamma = 0.50$ ) | DEM ( $\gamma = 0.70$ ) |
|-----------------|-------------------------|-------------------------|-------------------------|
| 1.0000 (0.0000) | 1.0000 (0.0000)         | 1.0000 (0.0000)         | 1.0000 (0.0000)         |
